# Supplementary material for: Intrafractional 6D head movement increases with time of mask fixation during stereotactic intracranial RT-sessions
Source: Springer Nature journal article supplement (doi:10.1186/s13014-019-1425-7), 2019-12-01
Supplement: MOESM1 [file 17692184]

**Supplementary Table 1: Patient and treatment characteristics**

|              |                                 | Total (n = 5)       |
|--------------|---------------------------------|---------------------|
| Age (y)      | Median                          | 52                  |
|              | Range                           | 32 – 72             |
| Sex          | Female                          | 3                   |
|              | Male                            | 2                   |
| BMI          | Mean (SD)                       | 28.1 (5.85)         |
|              | Range                           | 22.4 – 38.6         |
| KPS          | 100                             | 2                   |
|              | 90                              | 2                   |
|              | 80                              | 1                   |
| Tumor entity | Lung cancer metastasis          | 2                   |
|              | Pituitary adenoma               | 2                   |
|              | Glomus hypothympanicum tumor    | 1                   |
| PTV          | Range [cm <sup>3</sup> ] (Mean) | 6.56 – 69.91 (22.0) |
| GTV          | Range [cm <sup>3</sup> ] (Mean) | 0.88 – 22.30 (8.7)  |

**Supplementary Table 2:** Descriptive statistics of head motion (3DV), as well as of x, y and z displacements, grouped as measurement cohorts collected within 2-minute intervals after treatment start.

| Time [min] | Axis | N   | Mean [mm] | SD   | Confidence interval of mean |       |
|------------|------|-----|-----------|------|-----------------------------|-------|
|            |      |     |           |      | Lower                       | Upper |
| 0-2        | 3DV  | 68  | 0.21      | 0.26 | 0.14                        | 0.27  |
|            | X    |     | 0.04      | 0.20 | -0.01                       | 0.09  |
|            | Y    |     | 0.04      | 0.16 | 0.00                        | 0.08  |
|            | Z    |     | -0.02     | 0.20 | -0.07                       | 0.03  |
| 2-4        | 3DV  | 113 | 0.27      | 0.22 | 0.23                        | 0.31  |
|            | X    |     | 0.04      | 0.16 | 0.01                        | 0.07  |
|            | Y    |     | 0.05      | 0.24 | 0.01                        | 0.10  |
|            | Z    |     | -0.05     | 0.18 | -0.09                       | -0.02 |
| 4-6        | 3DV  | 87  | 0.43      | 0.42 | 0.34                        | 0.52  |
|            | X    |     | 0.02      | 0.27 | -0.04                       | 0.08  |
|            | Y    |     | 0.05      | 0.33 | -0.02                       | 0.12  |
|            | Z    |     | -0.16     | 0.39 | -0.24                       | -0.07 |
| 6-8        | 3DV  | 72  | 0.51      | 0.35 | 0.42                        | 0.59  |
|            | X    |     | 0.10      | 0.37 | 0.02                        | 0.19  |
|            | Y    |     | 0.04      | 0.33 | -0.04                       | 0.11  |
|            | Z    |     | -0.14     | 0.33 | -0.22                       | -0.07 |
| 8-10       | 3DV  | 58  | 0.46      | 0.29 | 0.38                        | 0.53  |
|            | X    |     | 0.03      | 0.35 | -0.06                       | 0.12  |
|            | Y    |     | 0.13      | 0.25 | 0.06                        | 0.19  |
|            | Z    |     | -0.21     | 0.21 | -0.26                       | -0.15 |
| 10-12      | 3DV  | 33  | 0.53      | 0.38 | 0.39                        | 0.66  |

|     |     |    |       |      |       |      |
|-----|-----|----|-------|------|-------|------|
|     | X   |    | 0.05  | 0.28 | -0.04 | 0.15 |
|     | Y   |    | 0.21  | 0.37 | 0.08  | 0.34 |
|     | Z   |    | -0.09 | 0.40 | -0.23 | 0.05 |
| >12 | 3DV | 22 | 0.48  | 0.31 | 0.35  | 0.62 |
|     | X   |    | 0.19  | 0.26 | 0.08  | 0.30 |
|     | Y   |    | 0.21  | 0.29 | 0.08  | 0.33 |
|     | Z   |    | -0.12 | 0.31 | -0.26 | 0.02 |

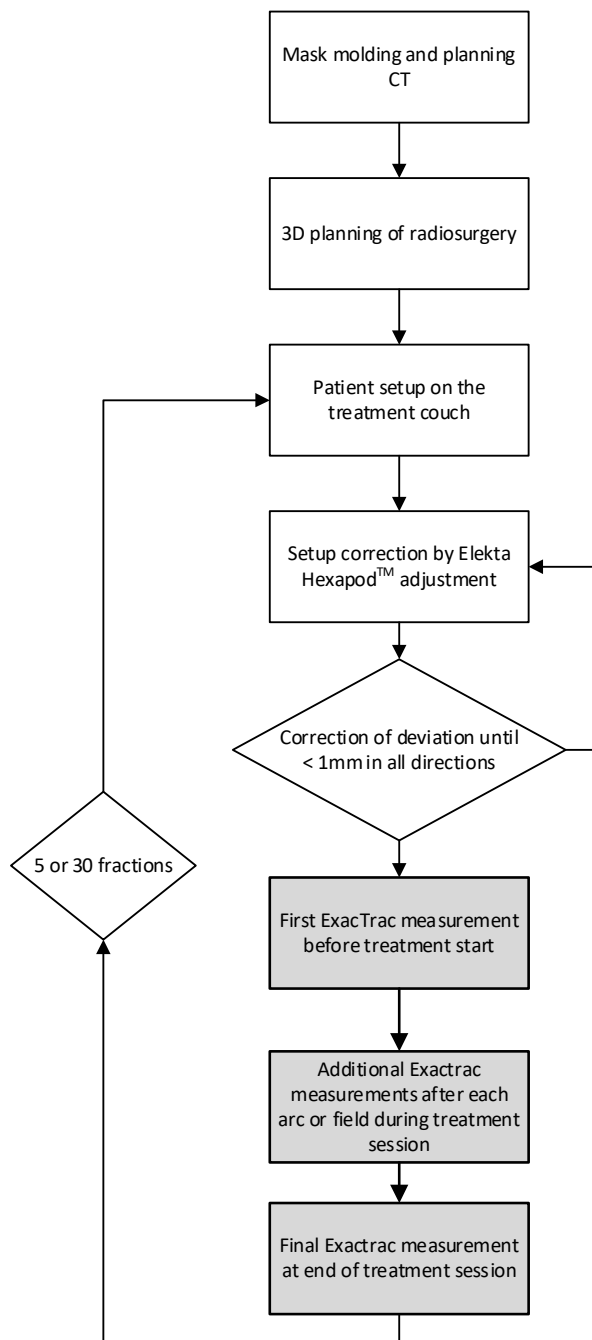

**Supplementary Figure 1:** Patient setup and repeated intrafractional tracking of head movement
